# Supplementary material for: On the relationship between tropospheric CO and CO&lt;sub&gt;2&lt;/sub&gt; during KORUS-AQand its role in constraining anthropogenic CO&lt;sub&gt;2&lt;/sub&gt;
Source: Copernicus journal article supplement (doi:10.5194/acp-2020-864), 2020-08-31
Supplement: Supplementary file 1 [file acp-2020-864-supplement.pdf]

# **On the relationship between tropospheric CO and CO<sub>2</sub> during KORUS-AQ and its role in constraining anthropogenic CO<sub>2</sub>**

**Tang et al., 2020**

## **Text S1:**

### **Technical details for simulating atmospheric CO<sub>2</sub> explicitly with external CO<sub>2</sub> fluxes in CAM-chem**

To add the online CO<sub>2</sub> simulation, we firstly define a new species called “CO<sub>2</sub>\_online” in the model. CAM-chem employs a chemical preprocessor (named chem\_mech.in by default) to generate CAM Fortran source code for the chemistry solver, which provides flexibility in defining and changing the chemical mechanism (Lamarque et al., 2012). We define “CO<sub>2</sub>\_online” in the chemical preprocessor to be explicitly solved. The CO<sub>2</sub> fluxes described in Section 2.1 are used as prescribed sources and sinks for the “CO<sub>2</sub>\_online” variable at the surface. We do not explicitly solve the chemical production of CO<sub>2</sub> to total CO<sub>2</sub> in these simulations. Although we added a capability to track the chemical contribution to CO<sub>2</sub> from CH<sub>4</sub> and NMVOCs (including CO) by adding an independent variable called “CO<sub>2</sub>\_chem” in CAM-chem, we will be investigating this variable in the future. For initial conditions, we use the CT2017 mole fraction fields to avoid long spin-up. We also note that the “CO<sub>2</sub>\_online” is a newly added chemical species in CAM-chem with no impact to model physics (such as radiative effect) yet.

**Table S1.** Summary of all CO<sub>2</sub> fluxes used in this study

| CO <sub>2</sub> fluxes | Spatial Res.            | Temporal Res.       | Period    | Transport Model   | Fossil Fuel Priors                | Biosphere and Fires Priors      | Ocean Priors                                     | Main Reference                                 |
|------------------------|-------------------------|---------------------|-----------|-------------------|-----------------------------------|---------------------------------|--------------------------------------------------|------------------------------------------------|
| CAMS (v17r1)           | 3.75° lon<br>1.875° lat | 3-hourly            | 1979-2017 | LMDz <sup>1</sup> | EDGAR scaled to CDIAC<br>"Miller" | ORCHIDEE (climatology) + GFEDv4 | Landschützer et al. (2014)                       | Chevallier (2018) <sup>2</sup>                 |
| CT2017                 | 1° lon<br>1° lat        | 3-hourly<br>monthly | 2000-2017 | TM5               | (EDGAR scaled to CDIAC) & "ODIAC" | CASA w/ GFED 4.1s GFED_CMS      | Jacobson et al. (2007)<br>Takahashi et al (2009) | Peters et al. (2007) <sup>3</sup>              |
| CTE2018                | 1° lon<br>1° lat        | monthly             | 2000-2016 | TM5               | EDGAR+ IER scaled to CDIAC        | SiBCASA- GFED4                  | Jacobson et al. (2007)                           | van der Laan-Luijkx et al. (2017) <sup>4</sup> |

<sup>1</sup>The Laboratoire de Météorologie Dynamique General Circulation Model (LMDz).

<sup>2</sup>Data available at <http://apps.ecmwf.int/datasets/data/cams-ghg-inversions>.

<sup>3</sup>With updates documented at <http://carbontracker.noaa.gov>.

<sup>4</sup>Data available at <http://www.carbontracker.eu>.

**Table S2.** Global budget of CO<sub>2</sub> (in 10<sup>15</sup> g C) and CO (in 10<sup>12</sup> g C) during KORUS-AQ (May 2016).

|                     |                                 | CO <sub>2</sub> (PgC) |        |         | CO<br>(TgC) |        |
|---------------------|---------------------------------|-----------------------|--------|---------|-------------|--------|
|                     |                                 | Region                | CT2017 | CTE2018 | CAMsv17r1   |        |
| Sources             | fossil fuel or<br>anthropogenic | Korea                 | 0.01   | 0.01    | /           | 0.11   |
|                     |                                 | Japan                 | 0.02   | 0.03    | /           | 0.13   |
|                     |                                 | EA-S                  | 0.07   | 0.07    | /           | 1.68   |
|                     |                                 | EA-M                  | 0.11   | 0.11    | /           | 2.71   |
|                     |                                 | EA-N                  | 0.05   | 0.04    | /           | 1.05   |
|                     |                                 | the rest              | 0.53   | 0.53    | /           | 18.44  |
|                     | fire                            |                       | 0.11   | 0.11    | /           | 9.69   |
|                     | biosphere                       |                       | /      | /       | /           | 3.25   |
|                     | ocean                           |                       | /      | /       | /           | 0.61   |
|                     | chemical production             |                       | /      | /       | /           | 58.40  |
| source total        |                                 | 0.90                  | 0.89   | /       | 96.07       |        |
| Sinks               | biosphere                       |                       | 0.63   | 0.90    | /           | /      |
|                     | ocean                           |                       | 0.26   | 0.18    | /           | /      |
|                     | chemical loss*                  |                       | /      | /       | /           | 102.76 |
|                     | sink total                      |                       | 0.88   | 1.08    | /           | 102.76 |
| Net (Sources-Sinks) |                                 | 0.01                  | -0.19  | -0.04   | -6.69       |        |
| Initial Burden      |                                 | 854.83                | 854.37 | 853.98  | 156.82      |        |
| Final Burden        |                                 | 854.93                | 854.19 | 853.93  | 145.10      |        |
| Initial-Final       |                                 | -0.10                 | 0.18   | 0.05    | 11.72       |        |
| Budget delta        |                                 | -0.08                 | -0.01  | 0.01    | 5.03        |        |

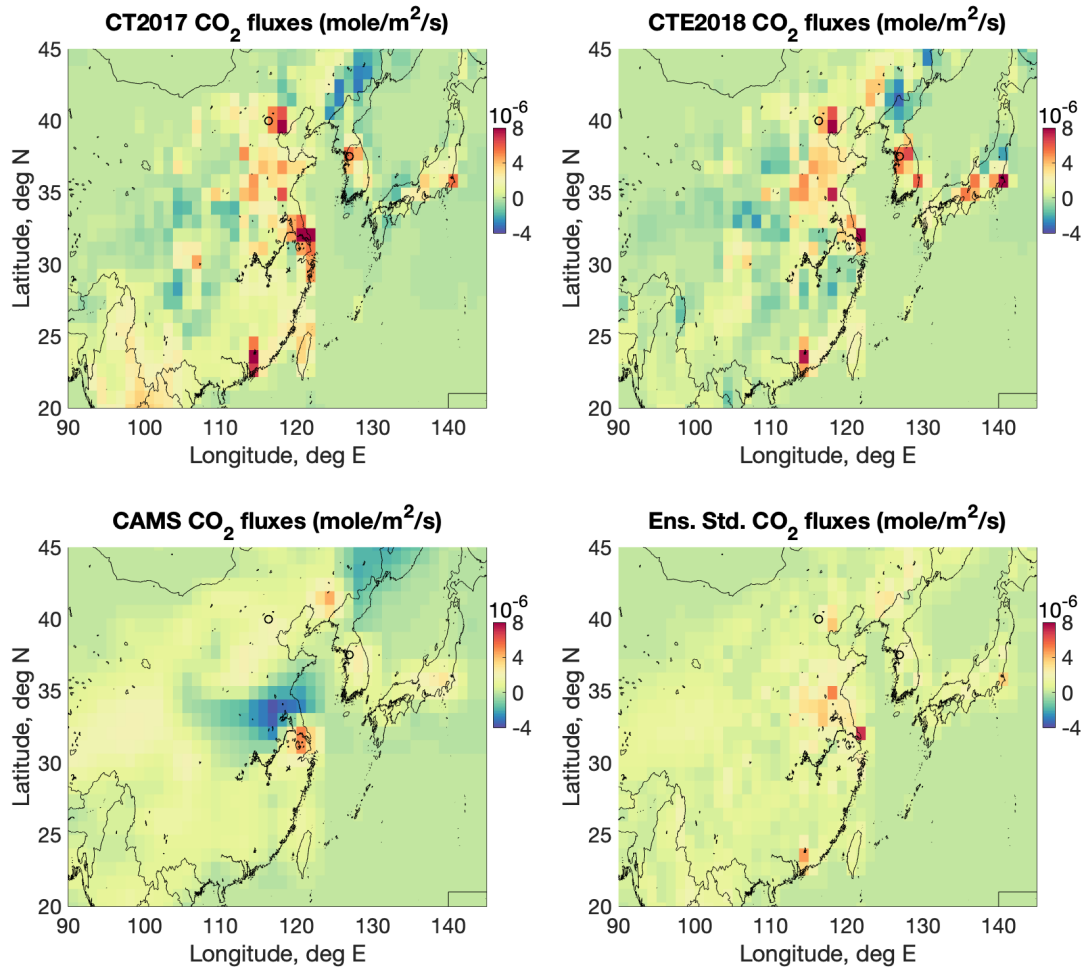

**Figure S1.** Spatial distribution of monthly-mean (May 2016) *a posteriori* fluxes from CT2017 (top left), CTE2018 (top right), CAMSv17r1 (bottom left), and the corresponding ensemble standard deviation across the three fluxes (bottom right).

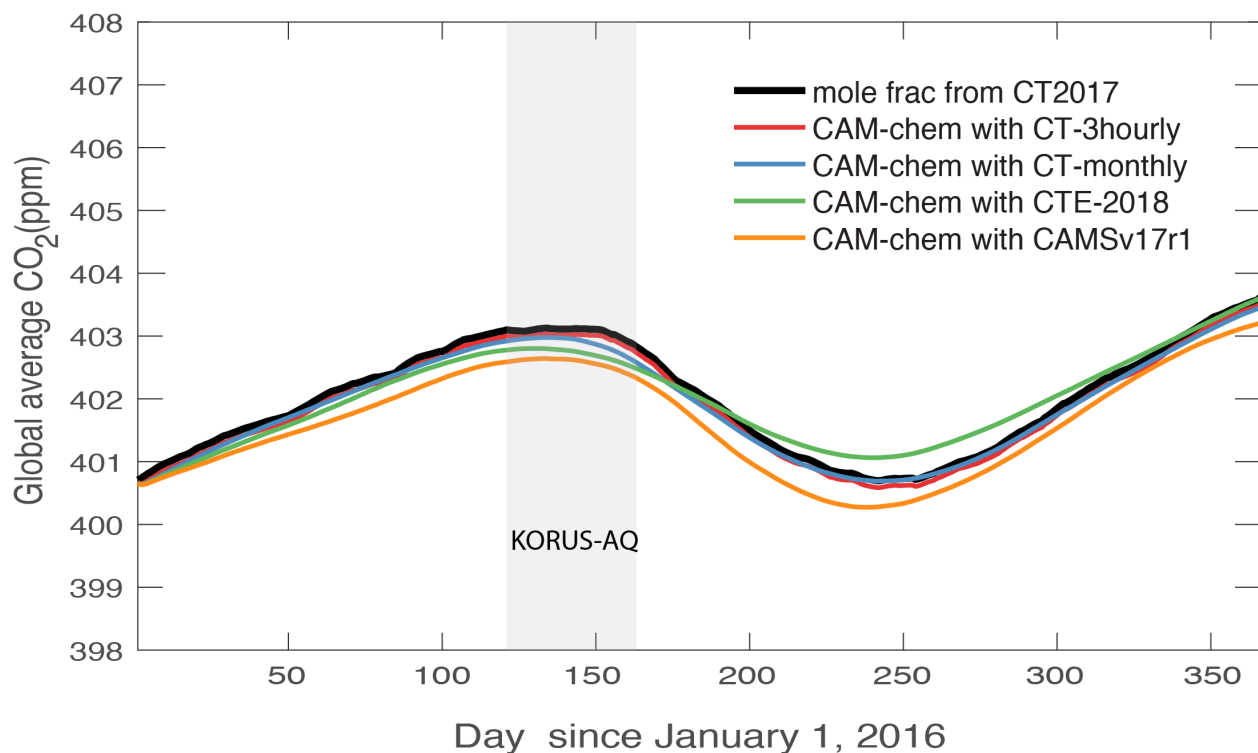

**Figure S2.** Global average atmospheric  $\text{CO}_2$  mixing ratios in 2016 from CT2017 mole fraction fields (black line) and CAM-chem simulations of  $\text{CO}_2$  (using fluxes from CT3h, red; CTm, blue, CTE2018, green; and CAMSv17r1, orange). The KORUS-AQ period corresponds to 122-162 days since January 1, 2016.

## Other observational datasets used in the study:

**Surface flask air sampling.** The NOAA ESRL Carbon Cycle Cooperative Global Air Sampling Network is an international effort that includes samples from the NOAA ESRL/GMD baseline observatories, cooperative fixed sites, as well as commercial ships (<https://www.esrl.noaa.gov/gmd/ccgg/flask.php>). We use the flask measurements of atmospheric CO<sub>2</sub> and CO dry air mole fractions from four ground sites in East Asia that are part of the NOAA ESRL Carbon Cycle Cooperative Global Air Sampling Network (Dlugokencky et al., 2018; Petron et al., 2018), namely Anmyeon-do (AMY), Lulin (LLN), Ulaan Uul (UUM), and Mt. Waliguan (WLG). For comparison, model results are interpolated to the four sites. These datasets serve as the data for baseline comparison and providing seasonal context of the model simulations.

**Ground-based remote sensing.** The Total Carbon Column Observing Network (TCCON) is a global ground-based network that measure column abundances of CO<sub>2</sub>, CO, CH<sub>4</sub>, N<sub>2</sub>O as well as other species that also absorb in the near-infrared (Wunch et al., 2011; <https://tccon-wiki.caltech.edu/>). In this study, XCO<sub>2</sub> and XCO measurements from four TCCON sites in East Asia (Release GGG2014) are used (Wunch et al., 2015), including Anmyeon-do (Goo et al., 2017), Saga (Shiomi et al., 2017), Tsukuba (Morino et al., 2017a), and Rikubetsu (Morino et al., 2017b). For comparison, model results are interpolated to TCCON locations and smoothed with TCCON *a priori* profiles and averaging kernels (AKs). These datasets also serve as our data for baseline comparison and consistency check with the corresponding satellite retrievals.

**Table S3.** Summary of all observations used in this study.

|                                                                       |                                                       | CO <sub>2</sub>     |                                                                             | CO              |
|-----------------------------------------------------------------------|-------------------------------------------------------|---------------------|-----------------------------------------------------------------------------|-----------------|
| Satellite Retrievals                                                  | Orbiting Carbon Observatory-2 (OCO-2)                 | Date product        | Level 2 v8 Lite XCO <sub>2</sub><br>2.25x1.29 km                            |                 |
|                                                                       |                                                       | Resolution          | Global coverage<br>2x/month                                                 |                 |
|                                                                       |                                                       | Revisit time        | 1:18 - 1:33 pm                                                              |                 |
|                                                                       |                                                       | Uncertainty         | 1-2 ppm XCO <sub>2</sub><br>(Boesch et al., 2011 and references therein)    |                 |
|                                                                       | Measurements Of Pollution In The Troposphere (MOPITT) | Date product        | TIR/NIR Level 2 v7 XCO                                                      |                 |
|                                                                       |                                                       | Resolution          | 22 x 22 km                                                                  |                 |
|                                                                       |                                                       | Revisit time        | ~3-4 days<br>10:30 AM                                                       |                 |
|                                                                       |                                                       | Uncertainty         | 0.09e18 molec/cm <sup>2</sup> total column retrieval; (Deeter et al., 2014) |                 |
| NOAA ESRL Carbon Cycle Cooperative Global (CCGG) Air Sampling Network | Anmyeon-do (AMY)<br>36.54°N, 126.33°E<br>85.12 masl   | Available period    | 2013.12 - now                                                               |                 |
|                                                                       |                                                       | Measuring method    | Surface flask air sampling                                                  |                 |
|                                                                       |                                                       | Data size           | 119 measurements in 2016                                                    |                 |
|                                                                       | Lulin (LLN)<br>23.47°N, 120.87°E<br>2862.00 masl      | Available period    | 2006.08 - now                                                               |                 |
|                                                                       |                                                       | Measuring method    | Surface flask air sampling                                                  |                 |
|                                                                       |                                                       | Data size           | 98 measurements in 2016                                                     |                 |
|                                                                       | Ulaan Uul (UUM)<br>44.45°N, 111.10°E<br>1007.00 masl  | Available period    | 1992.01 - now                                                               |                 |
|                                                                       |                                                       | Measuring method    | Surface flask air sampling                                                  |                 |
|                                                                       |                                                       | Data size           | 104 measurements in 2016                                                    |                 |
| Total Carbon Column Observing Network (TCCON)                         | Anmyeon-do<br>36.54°N, 126.33°E<br>30 masl            | Available period    | 2015.02 - 2016.11                                                           |                 |
|                                                                       |                                                       | Instrument          | ground-based Fourier Transform Spectrometers                                |                 |
|                                                                       |                                                       | Data size reference | 3081 measurements in 2016<br>Goo et al., 2017                               |                 |
|                                                                       | Saga<br>33.24°N, 130.29°E<br>7 masl                   | Available period    | 2011.07 - 2018.08                                                           |                 |
|                                                                       |                                                       | Instrument          | ground-based Fourier Transform Spectrometers                                |                 |
|                                                                       |                                                       | Data size reference | 7177 measurements in 2016<br>Shiomi et al., 2017                            |                 |
|                                                                       | Tsukuba<br>36.05°N, 140.12°E<br>31 masl               | Available period    | 2011.08 - 2017.12                                                           |                 |
|                                                                       |                                                       | Instrument          | ground-based Fourier Transform Spectrometers                                |                 |
|                                                                       |                                                       | Data size reference | 16499 measurements in 2016<br>Morino et al., 2017a                          |                 |
| Measurements during KORUS-AQ                                          | NASA DC-8 aircraft                                    | Available period    | 2013.11 - 2017.12                                                           |                 |
|                                                                       |                                                       | Instrument          | ground-based Fourier Transform Spectrometers                                |                 |
|                                                                       |                                                       | Data size reference | 6127 measurements in 2016<br>Morino et al., 2017b                           |                 |
|                                                                       |                                                       | Team                | AVOCET                                                                      | DACOM/DLH       |
|                                                                       | Taehwa ground site<br>37.31°N, 127.31°E               | Instrument          | LI-COR                                                                      | DACOM           |
|                                                                       |                                                       | Time Response       | 1 second                                                                    | 1 second        |
|                                                                       |                                                       | Precision           | < 0.1 ppm                                                                   | < 1% or 0.1 ppb |
|                                                                       |                                                       | Accuracy            | 0.25 ppm                                                                    | 2%              |
|                                                                       | Taehwa ground site<br>37.31°N, 127.31°E               | Instrument          | LI-COR LI-7500                                                              | Thermo 48i      |
|                                                                       |                                                       | Data intervals      | 1 hour                                                                      | 1 hour          |

**Table S4.** Summary statistics of CO and CO<sub>2</sub> from surface (in-situ/CCGG, column/TCCON), aircraft (DC-8), and remote sensing (OCO-2, MOPITT) measurements. npair is the number of data pairs of CO and CO<sub>2</sub>. Model equivalent and model evaluation against CO and CO<sub>2</sub> data are also shown. Units are ppm for CO<sub>2</sub> and ppb for CO.

|                                         |                 | NOAA/ESRL CCGG |       |       |       | TCCON |       |      |      |
|-----------------------------------------|-----------------|----------------|-------|-------|-------|-------|-------|------|------|
|                                         |                 | AMY            | LLN   | UUM   | WLG   | Amy   | Sag   | Tsu  | Rik  |
| npair                                   |                 | 95             | 64    | 86    | 89    | 3081  | 7177  | 6499 | 6127 |
| Obs                                     | CO <sub>2</sub> | 415            | 407   | 406   | 405   | 403   | 406   | 403  | 403  |
| Mean                                    | CO              | 217            | 124   | 142   | 130   | 109   | 108   | 103  | 99   |
| Obs                                     | CO <sub>2</sub> | 12             | 3     | 6     | 3     | 3     | 2     | 2    | 3    |
| Std                                     | CO              | 67             | 55    | 26    | 26    | 8     | 15    | 14   | 15   |
| Obs R <sub>CO2,CO</sub>                 |                 | 0.32           | 0.31  | 0.48  | 0.36  | 0.59  | 0.52  | 0.37 | 0.28 |
| Obs ΔCO/ΔCO <sub>2</sub>                |                 | 5.90           | 18.90 | 4.53  | 9.42  | 2.86  | 7.40  | 5.63 | 4.81 |
| Model Mean                              | CO <sub>2</sub> | 414            | 405   | 405   | 406   | 403   | 405   | 404  | 403  |
|                                         | CO              | 239            | 142   | 129   | 187   | 105   | 111   | 102  | 93   |
| Model                                   | CO <sub>2</sub> | 6-8            | 2     | 6-8   | 5-7   | 2-3   | ~2    | ~2   | 3-4  |
| Std                                     | CO              | 124            | 103   | 52    | 173   | 12    | 19    | 17   | 20   |
| Model R <sub>CO2,CO</sub><br>(min/max)  |                 | -0.12          | 0.46  | 0.16  | 0.40  | -0.2  | 0.51  | 0.33 | 0.05 |
|                                         |                 | 0.18           | 0.70  | 0.27  | 0.71  | -0.1  | 0.54  | 0.44 | 0.29 |
| Model ΔCO/ΔCO <sub>2</sub><br>(min/max) |                 | 21.01          | 48.85 | 6.64  | 33.88 | /     | 9.53  | 7.43 | 5.57 |
|                                         |                 | 26.17          | 59.80 | 8.68  | 44.47 |       | 11.24 | 8.67 | 7.53 |
| Bias<br>Model<br>minus<br>Obs           | CT3h            | -0.2           | -1.4  | -0.6  | -0.1  | -0.6  | -1.0  | 0.9  | -0.1 |
|                                         | CTm             | -0.2           | -1.4  | -0.7  | 0.3   | -0.2  | -1.0  | 1.1  | 0.2  |
|                                         | CTE2018         | 1.4            | -1.2  | -0.3  | 1.5   | 0.5   | -0.6  | 1.6  | 0.6  |
|                                         | CAMS            | -3.4           | -1.6  | -1.0  | 0.1   | -0.9  | -1.5  | 0.3  | -0.5 |
|                                         | CT2017          |                |       |       |       |       |       |      |      |
| R<br>Model<br>versus<br>Obs             | CO              | 22.0           | 18.1  | -13.7 | 57.1  | -4.3  | 2.3   | -0.9 | -6.1 |
|                                         | CT3h            | 0.74           | 0.46  | 0.84  | 0.83  | 0.92  | 0.85  | 0.87 | 0.94 |
|                                         | CTm             | 0.70           | 0.71  | 0.86  | 0.81  | 0.92  | 0.87  | 0.86 | 0.94 |
|                                         | CTE2018         | 0.81           | 0.62  | 0.88  | 0.69  | 0.91  | 0.86  | 0.84 | 0.91 |
|                                         | CAMS            | 0.67           | 0.67  | 0.92  | 0.82  | 0.92  | 0.86  | 0.89 | 0.95 |
| RMSE                                    | CT2017          |                |       |       |       |       |       |      |      |
|                                         | CO              | 0.68           | 0.92  | 0.21  | 0.22  | 0.40  | 0.63  | 0.61 | 0.66 |
|                                         | CT3h            | 8.1            | 3.0   | 4.5   | 4.4   | 1.3   | 1.5   | 1.5  | 1.2  |
|                                         | CTm             | 8.6            | 2.5   | 3.3   | 2.8   | 1.2   | 1.4   | 1.6  | 1.1  |
|                                         | CTE2018         | 7.4            | 2.6   | 3.0   | 4.0   | 1.4   | 1.2   | 2.1  | 1.4  |
| errorR                                  | CAMS            | 9.7            | 2.7   | 2.7   | 2.6   | 1.5   | 1.8   | 1.2  | 1.1  |
|                                         | CT2017          |                |       |       |       |       |       |      |      |
|                                         | CO              | 94.6           | 59.0  | 54.7  | 177.9 | 12.1  | 15.5  | 14.1 | 16.2 |
|                                         | CT3h            | 0.43           | 0.17  | 0.43  | 0.49  | 0.10  | 0.31  | 0.15 | 0.01 |
|                                         | CTm             | 0.41           | 0.32  | 0.46  | 0.62  | 0.07  | 0.30  | 0.19 | 0.40 |
|                                         | CTE2018         | 0.47           | 0.36  | 0.50  | 0.84  | 0.34  | 0.30  | 0.34 | 0.56 |
|                                         | CAMS            | 0.54           | 0.13  | 0.48  | 0.79  | 0.13  | 0.31  | 0.22 | 0.43 |



## Observed and modeled CO<sub>2</sub> and CO at NOAA CCGG sites in the region

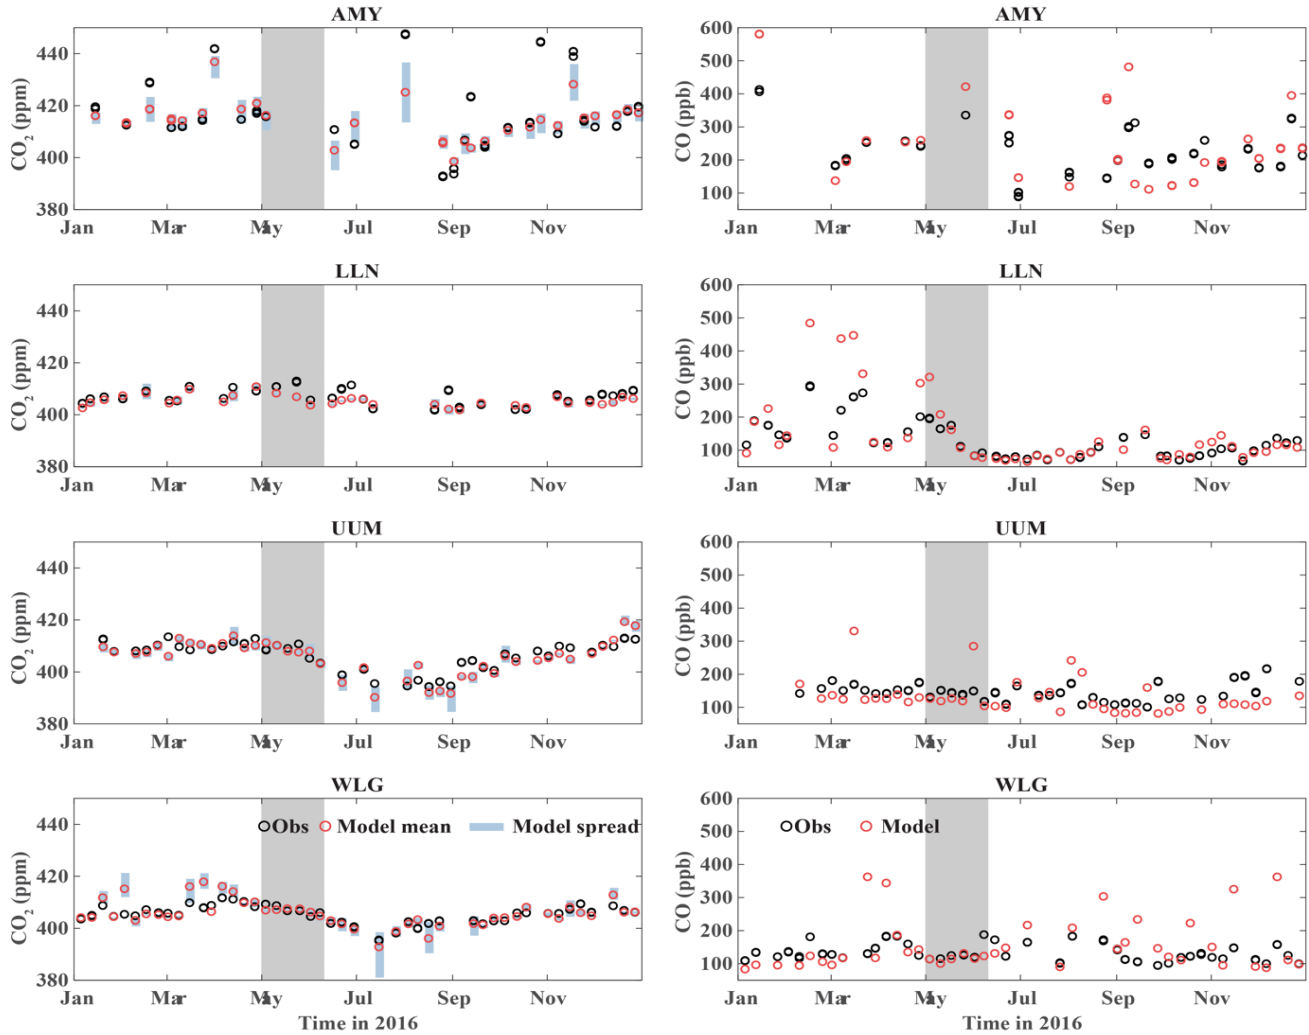

**Figure S3.** Time series of CO<sub>2</sub> data (left panel) and CO data (right panel) in black dots superimposed with the corresponding model results (red dots) at four East Asia sites from the NOAA ESRL Carbon Cycle Cooperative Global (CCGG) Air Sampling Network in 2016. The equivalent modeled CO<sub>2</sub> is represented as the mean of four model simulations with the blue bars representing the spread (min/max) of the four model simulations) The KORUS-AQ period (May 1 – June 10) is indicated in grey shade.

## Observed and modeled CO<sub>2</sub> and CO at TCCON sites in the region

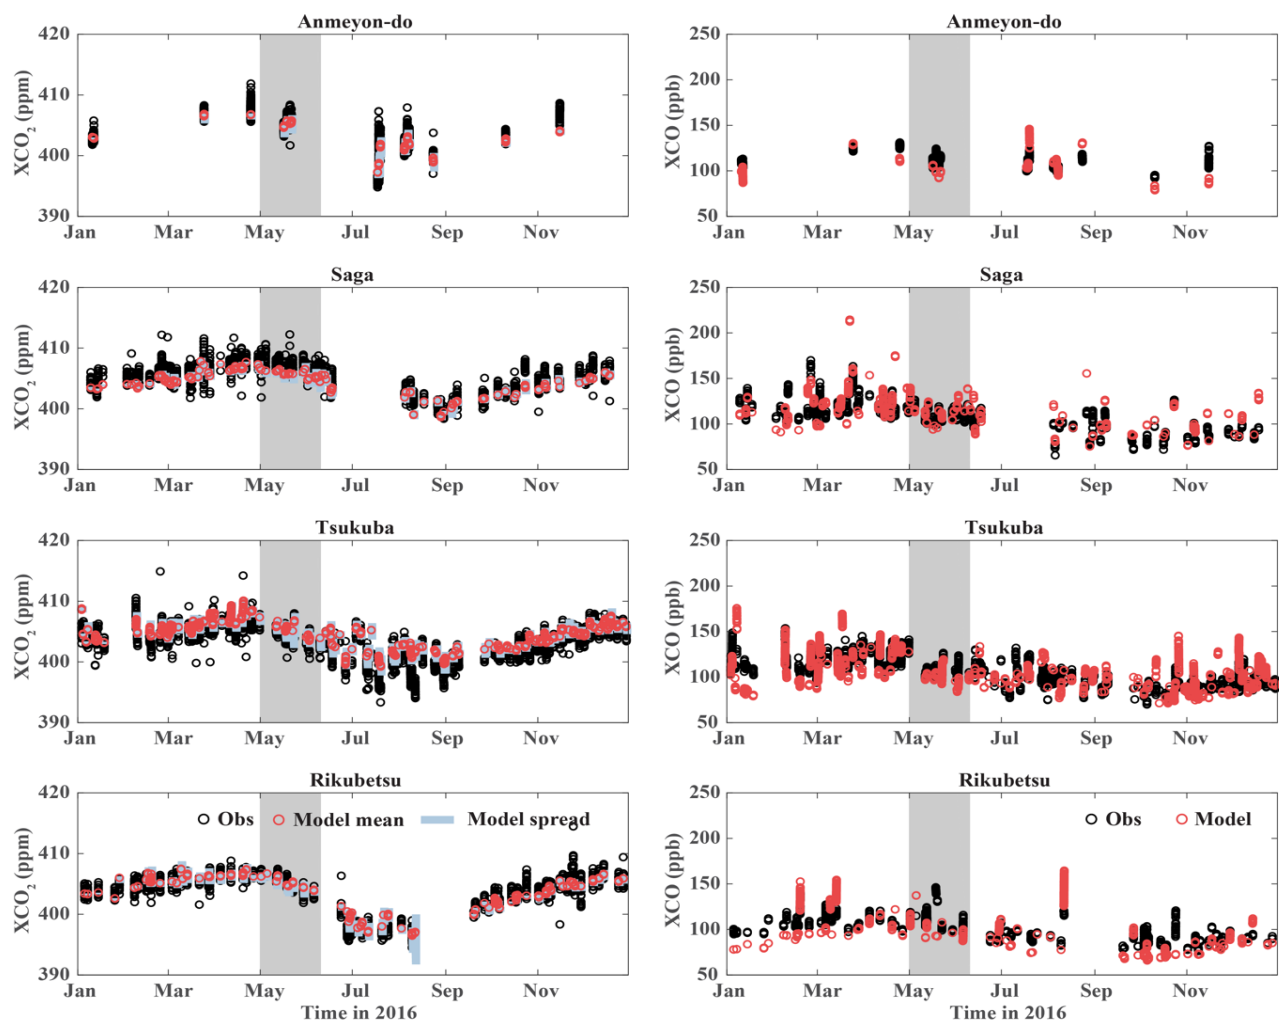

**Figure S4.** Time series of observations (black dots) and corresponding model results (red dots) The equivalent modeled CO<sub>2</sub> is represented as the ensemble mean of four model simulations with the blue bars representing the spread (min/max) of the four model simulations at four TCCON sites in 2016. KORUS-AQ period (May 1 – June 10) is indicated in gray shade.

## Observed and modeled XCO<sub>2</sub> and XCO in the region

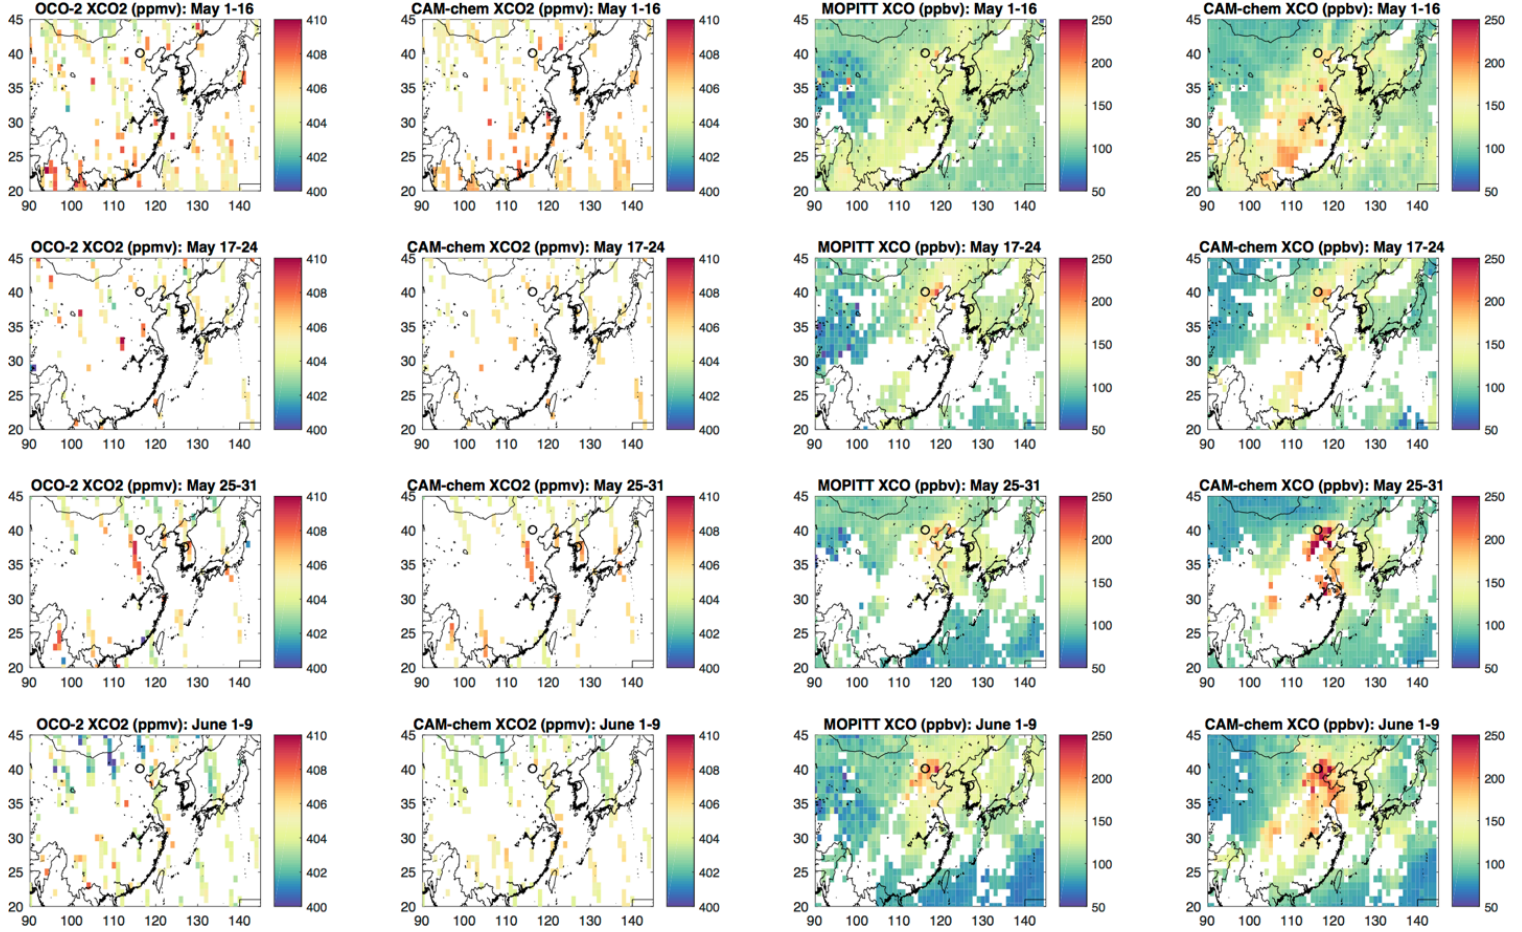

**Figure S5.** Comparison CAM-Chem results with CO<sub>2</sub> and CO satellite data (similar to Figure 2 of main text but for specific periods during the campaign). Panels in the first column correspond to the mean OCO-2 XCO<sub>2</sub> column density across KORUS-AQ period (ppm) and equivalent XCO<sub>2</sub> averaged across four model simulations in the second column). Panels in the third column correspond to MOPITT XCO column density averaged across KORUS-AQ period (ppb) and equivalent XCO (fourth column).

## Tagging ffCO<sub>2</sub> and CO

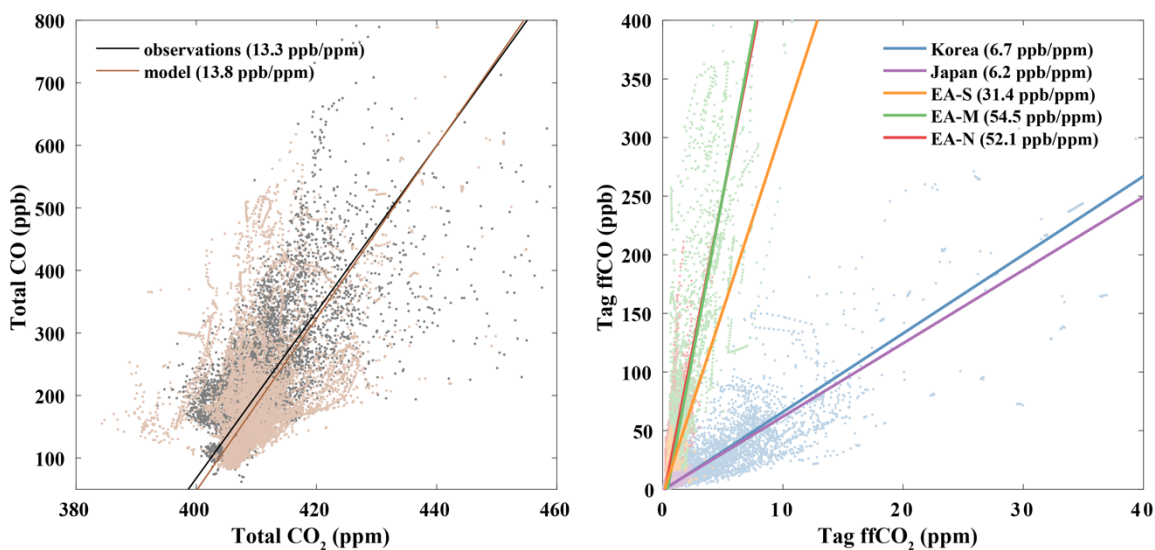

**Figure S6.** Comparison between observed (black) and modeled (brown) total CO<sub>2</sub> and CO mixing ratios (left panel) and corresponding association of modeled ffCO and ffCO<sub>2</sub> tags in CAM-Chem.

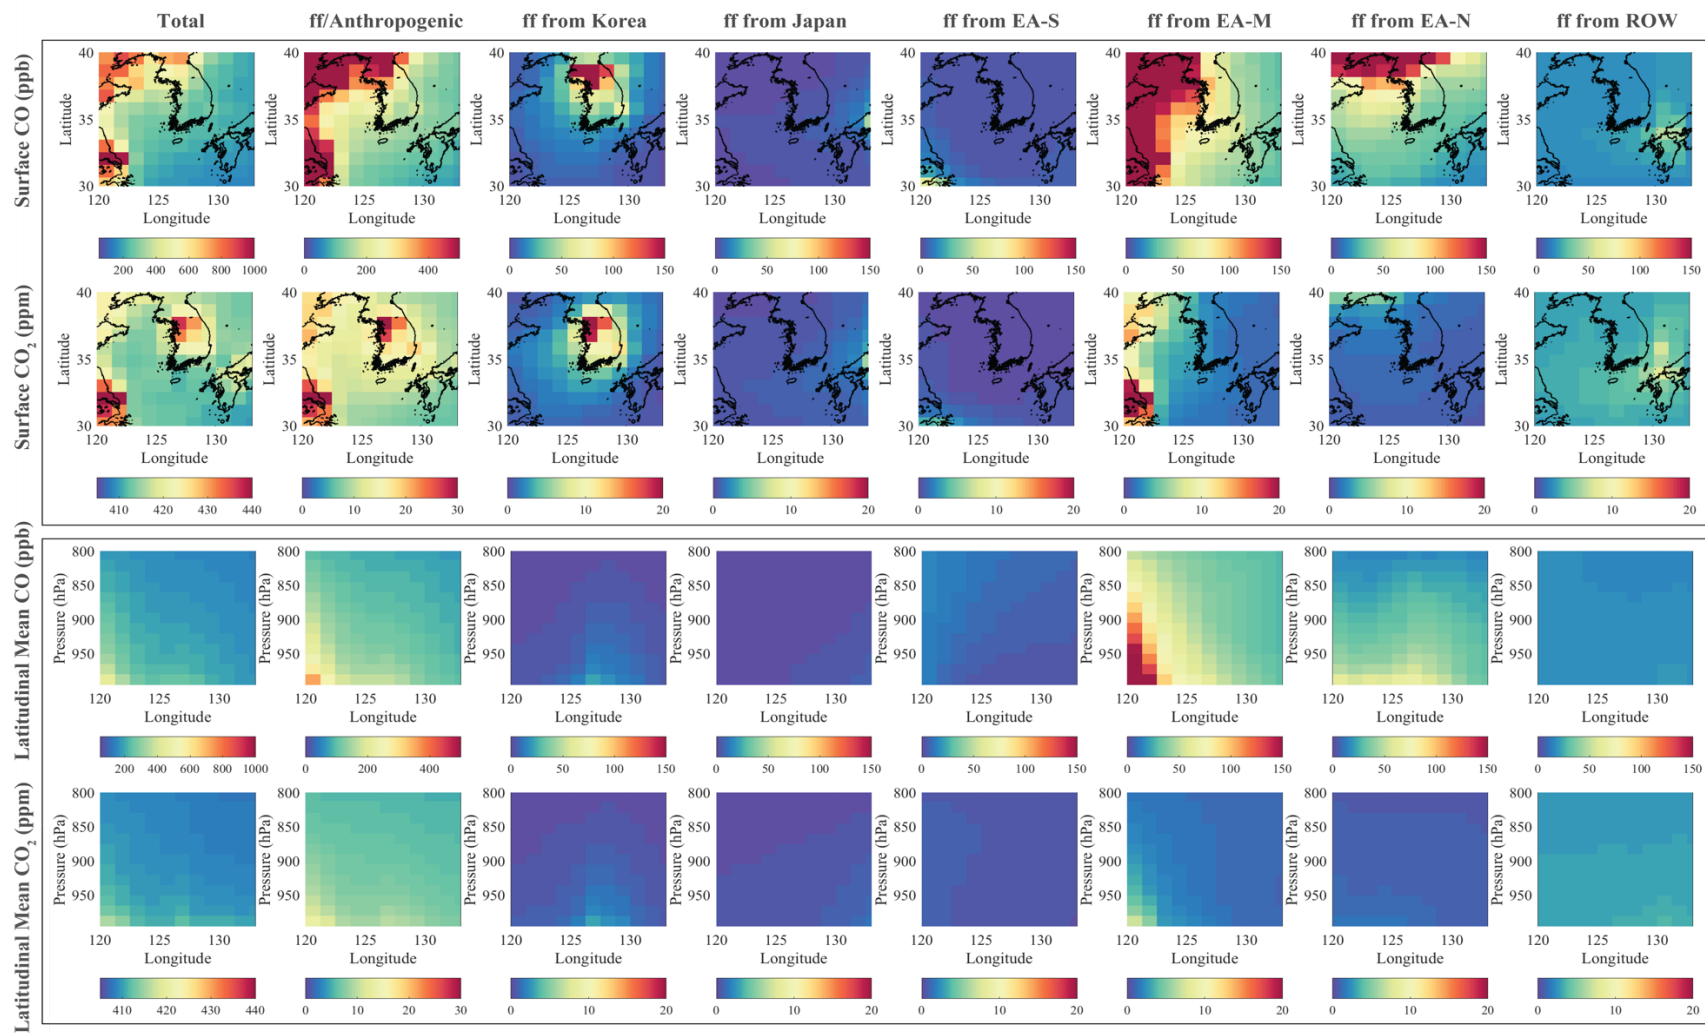

**Figure S7.** Spatial distribution of CO<sub>2</sub> and CO over Seoul and nearby regions. This is shown in the different columns for total CO<sub>2</sub> (or CO), its associated ffCO<sub>2</sub> (or ffCO) and regional contributions at the surface (top), along with corresponding mean zonal distributions averaged across KORUS-AQ domain (bottom).



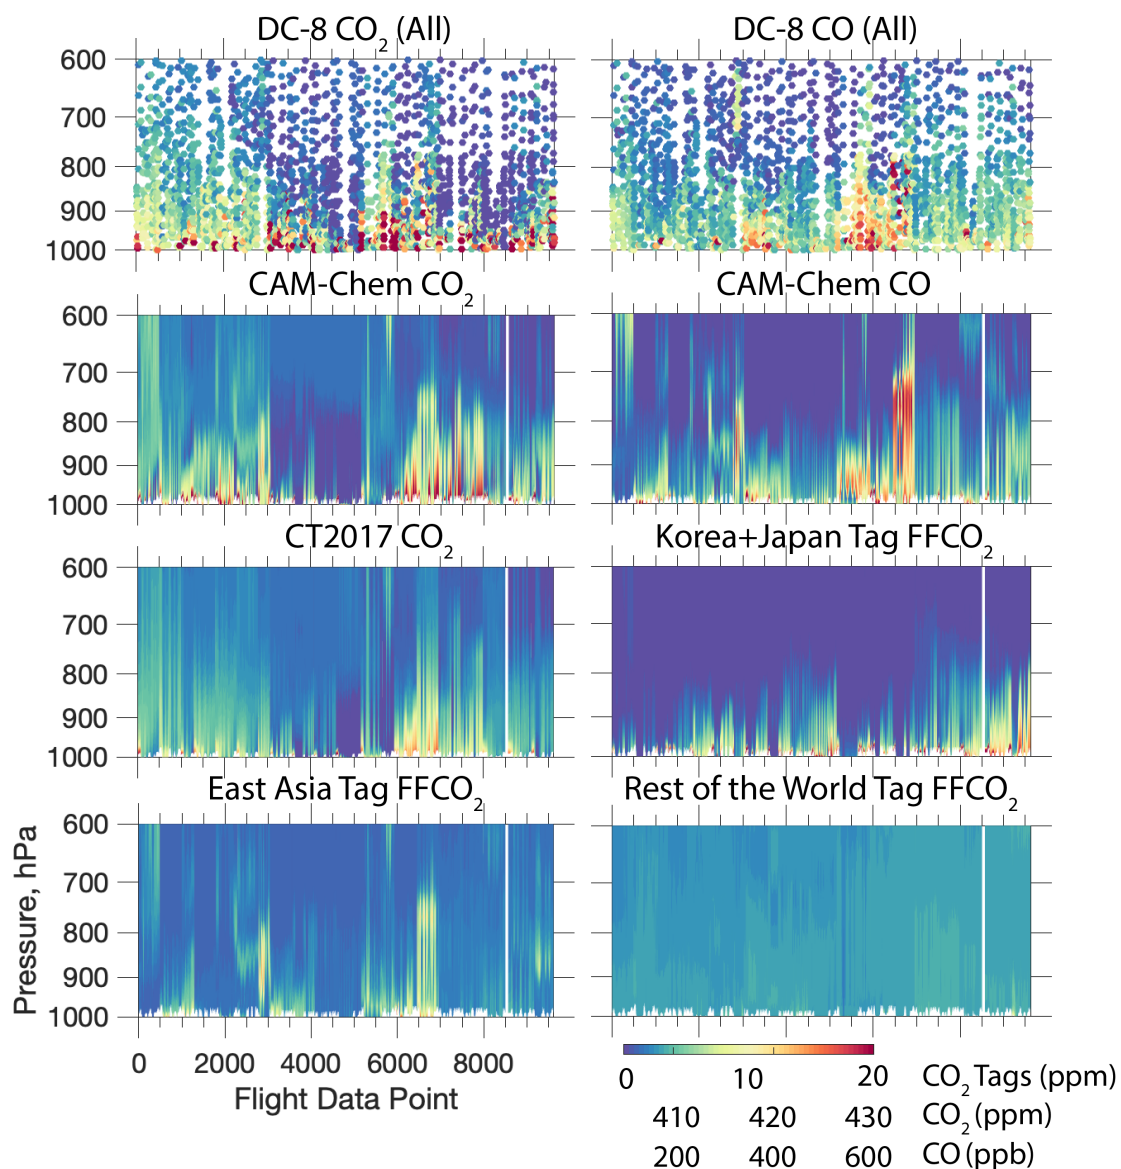

**Figure S8.** KORUS-AQ flight curtains for DC-8 CO<sub>2</sub> and CO (top row) and for CAM-Chem model equivalent (second row) and for Carbon Tracker CO<sub>2</sub> files (CT3h, third row, left panel). These curtains correspond to all flight data points of the campaign (flight group:All). Also shown are corresponding contributions of a priori ffCO<sub>2</sub> response functions from Korea+Japan (third row, right panel), East Asia (fourth row, left) and Rest of the World (fourth row, right).

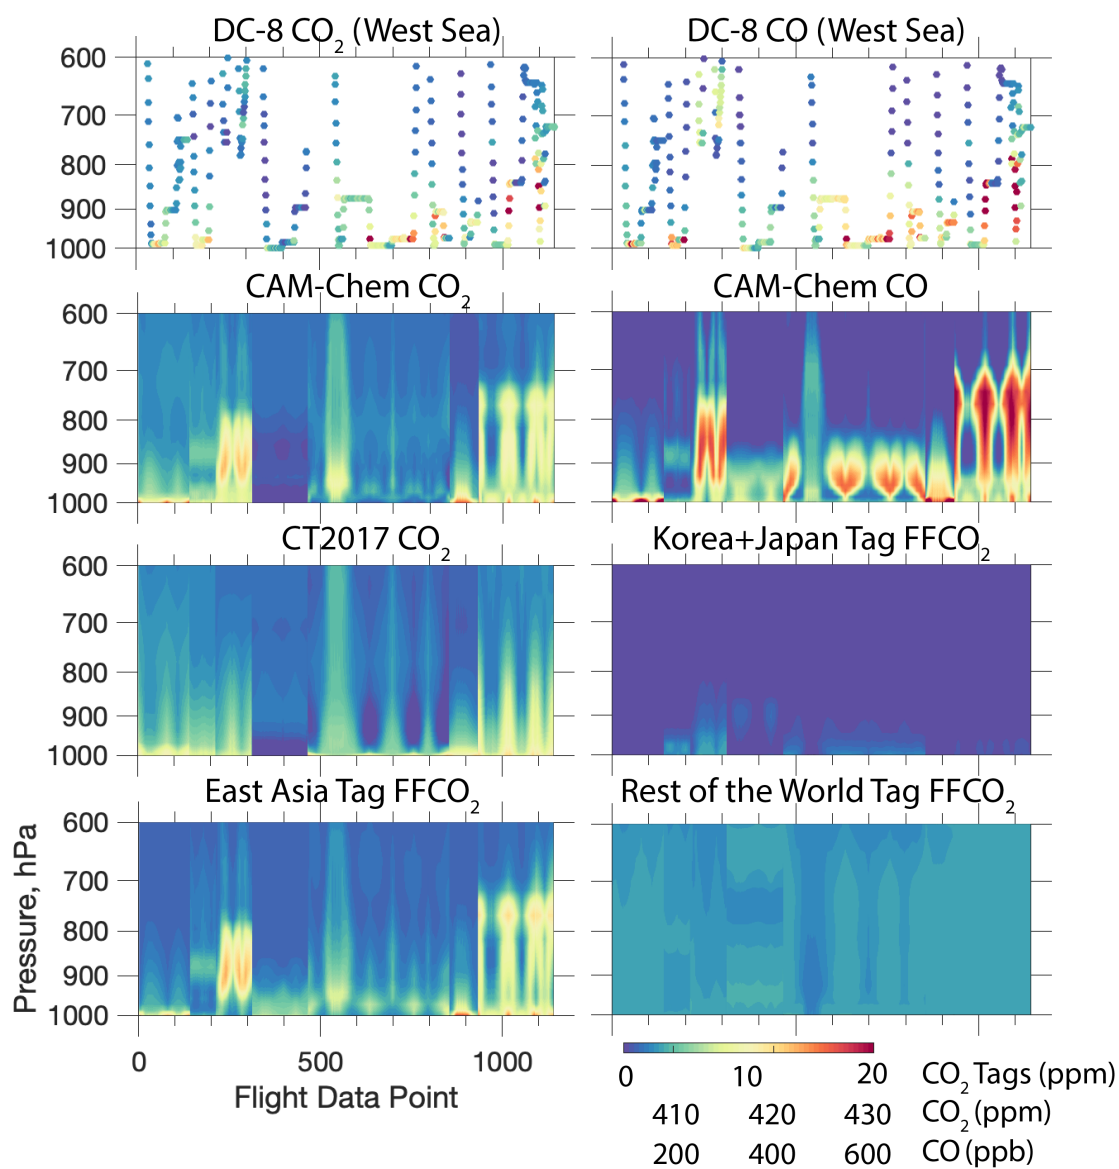

**Figure S9.** Same as Figure S7 but for West Sea flight group.

## Other References (not cited in main text)

- Morino, I., T. Matsuzaki, A. Shishime.: TCCON data from Tsukuba, Ibaraki, Japan, 125HR, Release GGG2014R2. TCCON data archive, hosted by CaltechDATA, California Institute of Technology, Pasadena, CA, U.S.A. <http://doi.org/10.14291/tccon.ggg2014.tsukuba02.R2>, 2017a.
- Morino, I., N. Yokozeki, T. Matzuzaki, A. Shishime.: TCCON data from Rikubetsu, Hokkaido, Japan, Release GGG2014R2. TCCON data archive, hosted by CaltechDATA, California Institute of Technology, Pasadena, CA, U.S.A. <https://doi.org/10.14291/tccon.ggg2014.rikubetsu01.R2>, 2017b.
- Oh, Y.S., Kenea, S.T., Goo, T.Y., Chung, K.S., Rhee, J.S., Ou, M.L., Byun, Y.H., Wennberg, P.O., Kiel, M., DiGangi, J.P. and Diskin, G.S.: Characteristics of greenhouse gas concentrations derived from ground-based FTS spectra at Anmyeondo, South Korea, *Atmospheric Measurement Techniques*, 11, 2361-2374, 2018.
- Landschützer, P., Gruber, N., Bakker, D.C. and Schuster, U.: Recent variability of the global ocean carbon sink. *Global Biogeochemical Cycles*, 28(9), 927-949, 2014.
- Petron, G., Crotwell, A.M., Lang, P.M., Dlugokencky, E.: Atmospheric Carbon Monoxide Dry Air Mole Fractions from the NOAA ESRL Carbon Cycle Cooperative Global Air Sampling Network, 1988-2017, Version: 2018-10-17, Path: [ftp://aftp.cmdl.noaa.gov/data/trace\\_gases/co/flask/surface/](ftp://aftp.cmdl.noaa.gov/data/trace_gases/co/flask/surface/), 2018.
- Wunch, D., Toon, G. C., Blavier, J. F. L., Washenfelder, R. A., Notholt, J., Connor, B. J., Griffith, D. W., Sherlock, V., and Wennberg, P. O.: The total carbon column observing network, *Philosophical Transactions of the Royal Society A*, 369, 2087–2112, 2011.
